# Supplementary material for: Multibatch TMT Reveals False Positives, Batch Effects and Missing Values
Source: PubMed Central journal article supplement (PMC6773557; doi:10.1074/mcp.ra119.001472), 2019-07-22

Number of peptides detected (MS2)

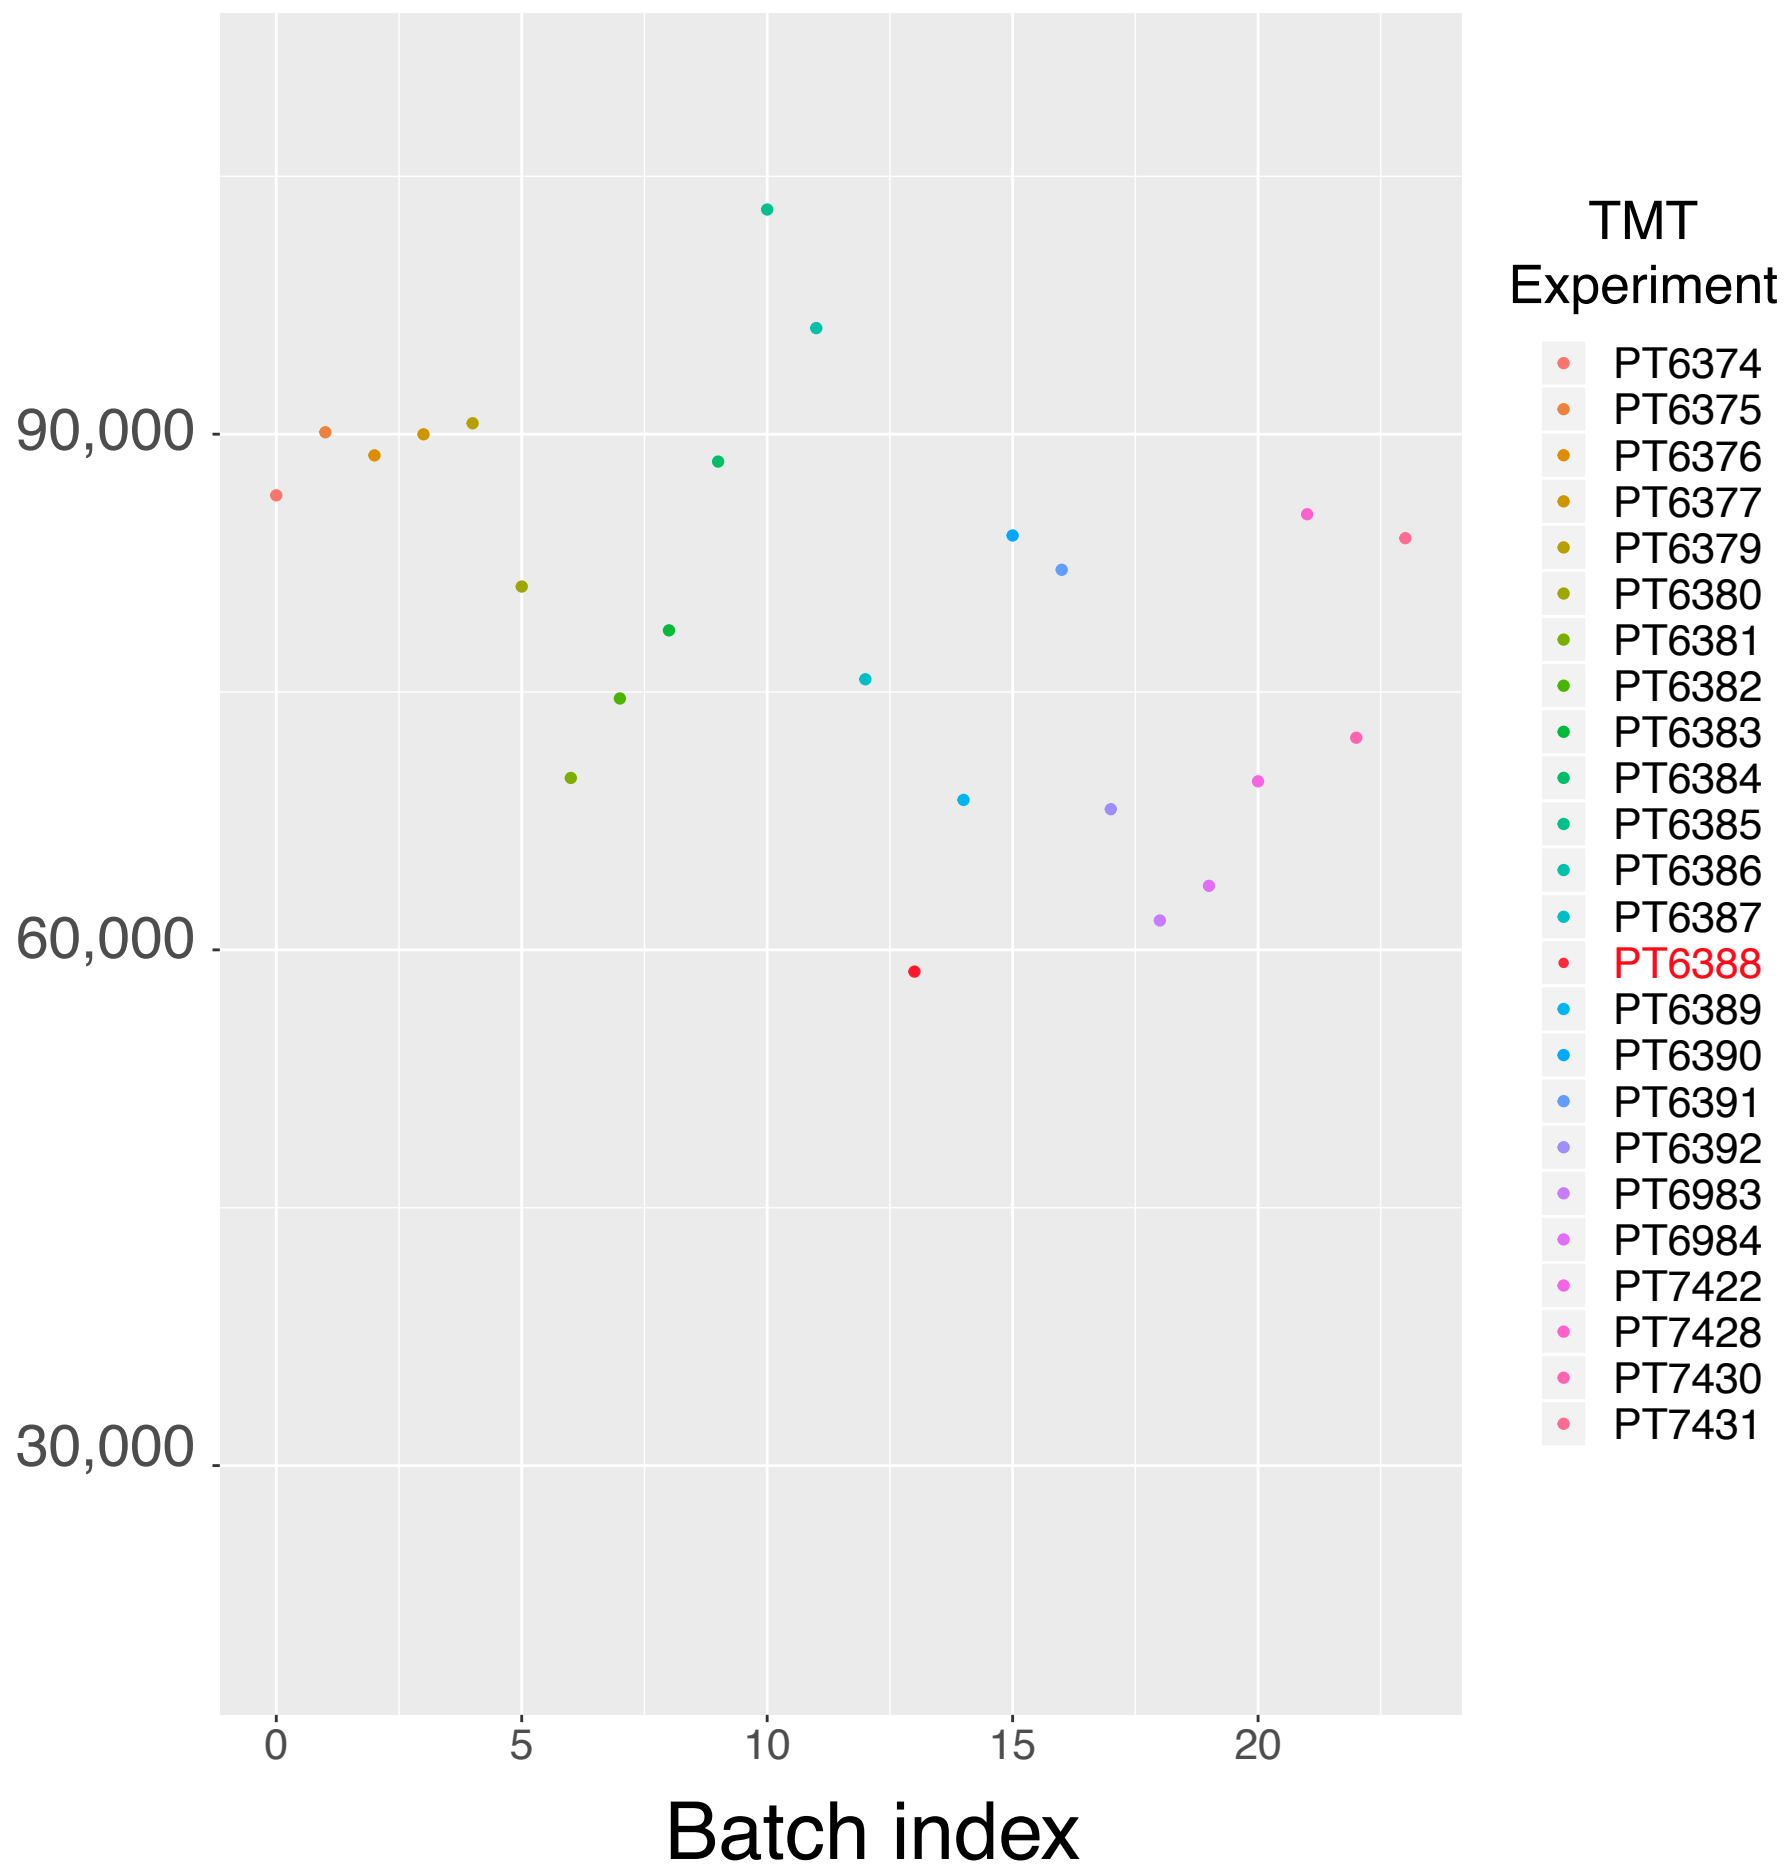

Supplement: 144550_2_supp_346176_psxjvp.pdf [file 144550_2_supp_346176_psxjvp.pdf]
