# Supplementary material for: Multibatch TMT Reveals False Positives, Batch Effects and Missing Values
Source: PubMed Central journal article supplement (PMC6773557; doi:10.1074/mcp.ra119.001472), 2019-07-22

Number of proteins detected MS3

9,000  
8,000  
7,000  
6,000

0

50

100

150

200

250

Cell line index

TMT  
Experiment

- PT6374
- PT6375
- PT6376
- PT6377
- PT6379
- PT6380
- PT6381
- PT6382
- PT6383
- PT6384
- PT6385
- PT6386
- PT6387
- PT6388
- PT6389
- PT6390
- PT6391
- PT6392
- PT6983
- PT6984
- PT7422
- PT7428
- PT7430
- PT7431

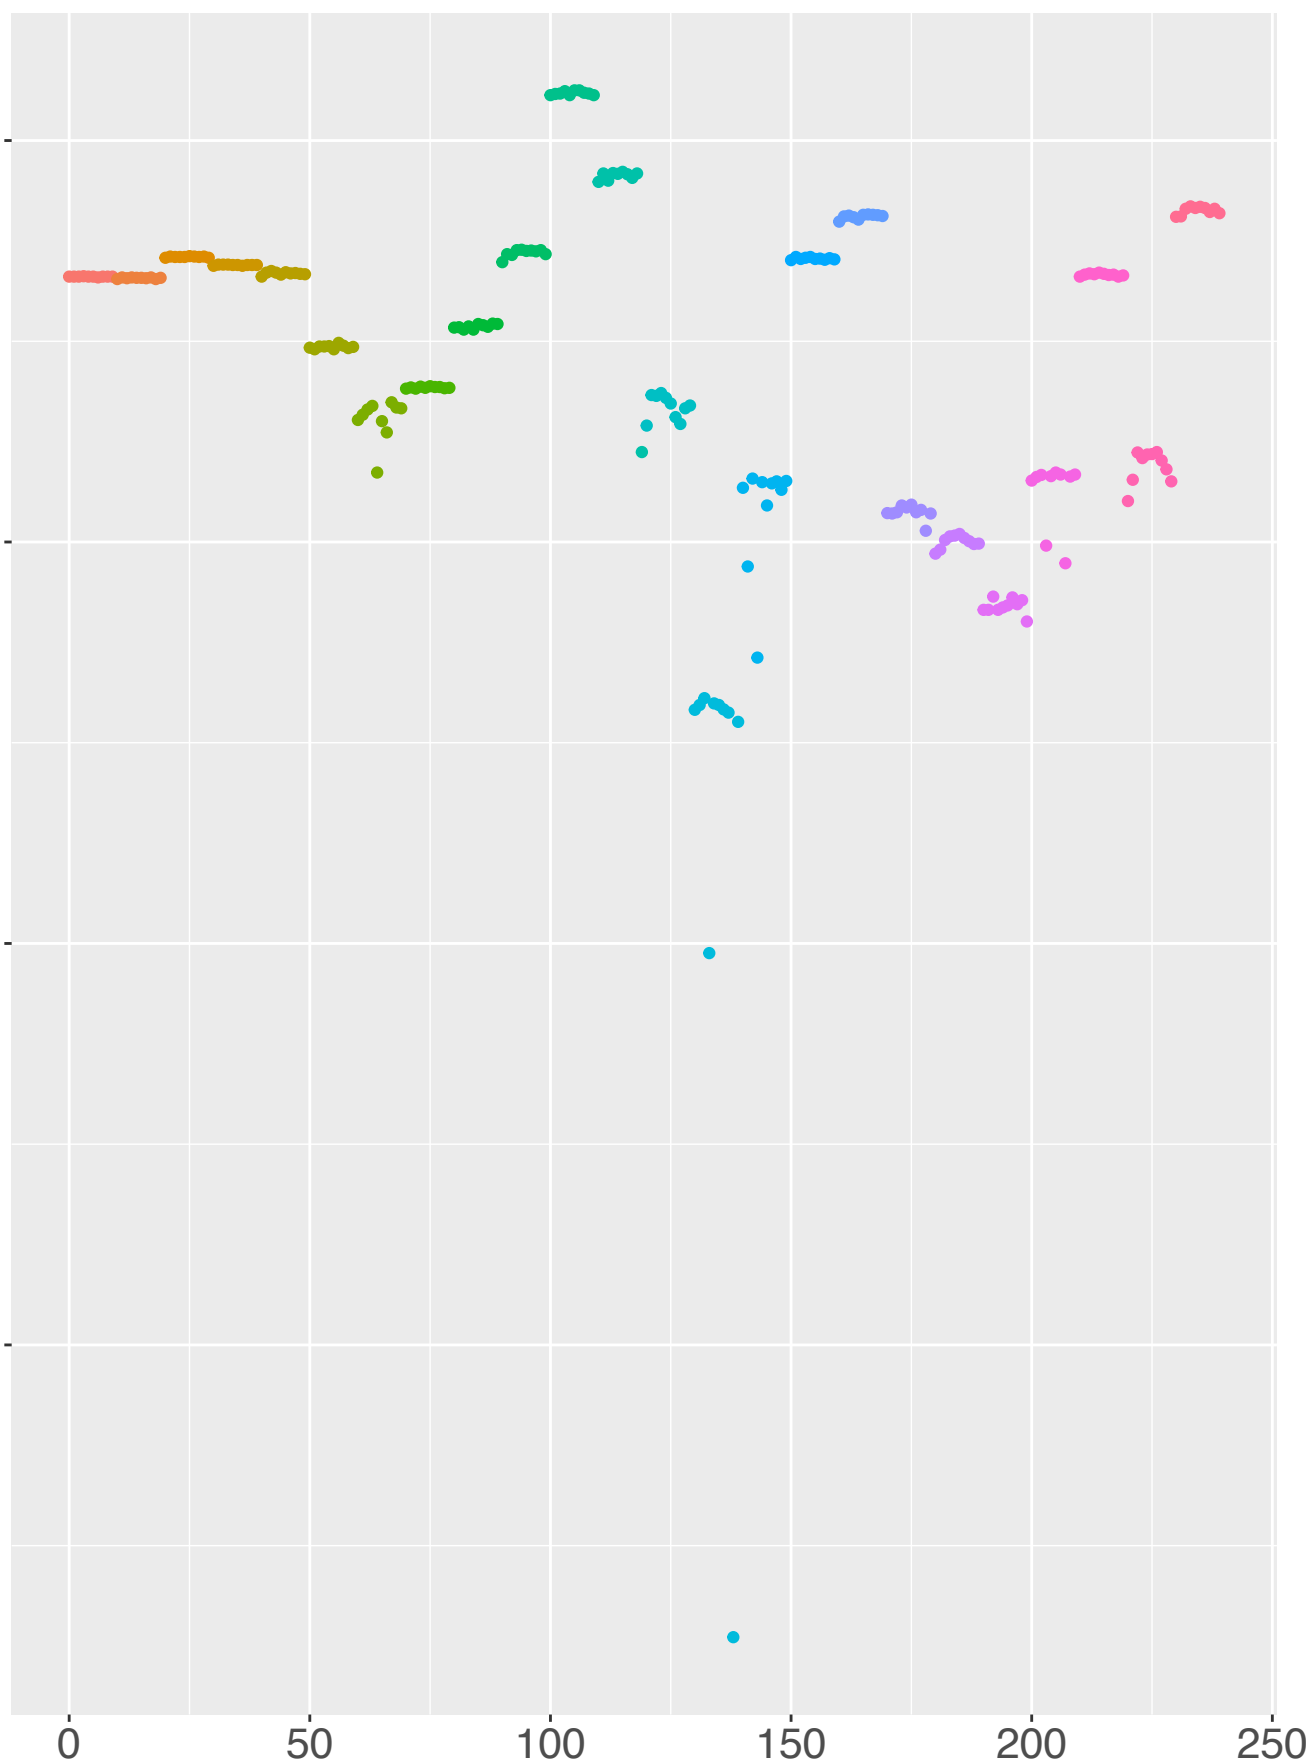

Supplement: 144550_2_supp_346178_psxjmq.pdf [file 144550_2_supp_346178_psxjmq.pdf]
