# Supplementary material for: Multibatch TMT Reveals False Positives, Batch Effects and Missing Values
Source: PubMed Central journal article supplement (PMC6773557; doi:10.1074/mcp.ra119.001472), 2019-07-22

batch  
pt6374 pt6380 pt6384 pt6388 pt6984  
pt6375 pt6381 pt6385 pt6389 pt7422  
pt6377 pt6382 pt6386 pt6391 pt7428  
pt6379 pt6383 pt6387 pt6983 pt7431

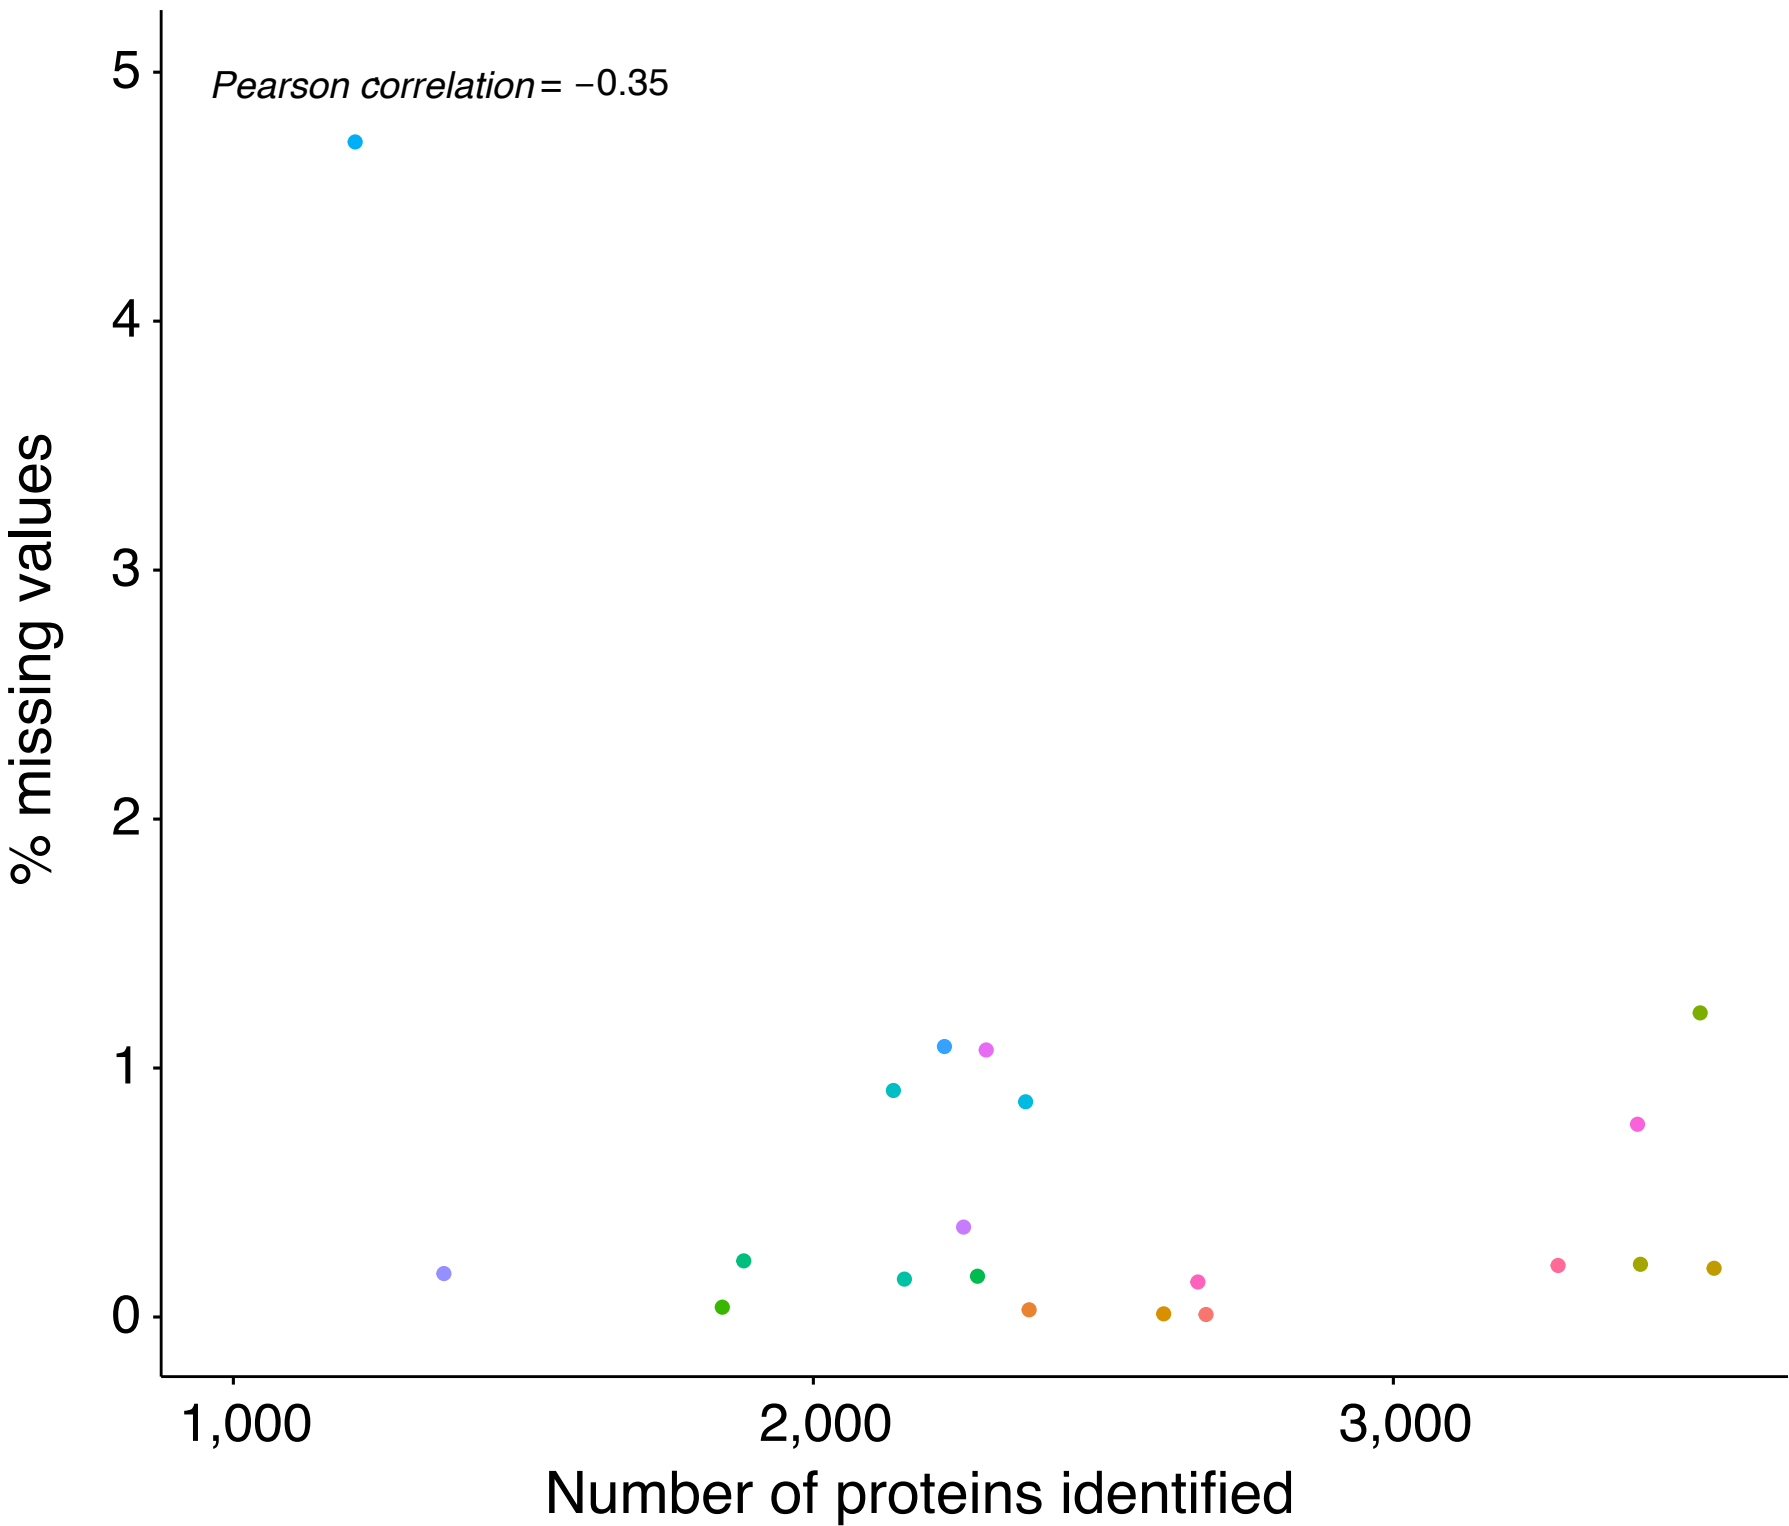

Supplement: 144550_2_supp_346187_psxj1r.pdf [file 144550_2_supp_346187_psxj1r.pdf]
