# Supplementary material for: Multibatch TMT Reveals False Positives, Batch Effects and Missing Values
Source: PubMed Central journal article supplement (PMC6773557; doi:10.1074/mcp.ra119.001472), 2019-07-22

TMT batch

- pt6374
- pt6375
- pt6377
- pt6379
- pt6380
- pt6381
- pt6382
- pt6383
- pt6384
- pt6385
- pt6386
- pt6387
- pt6388
- pt6389
- pt6391
- pt6984
- pt7422
- pt7428
- pt7431
- pt6983

Number of ptoeins identified (MS2 per batch)

*Pearson correlation = 0.16*

9,000

8,500

8,000

1,000

2,000

3,000

Number of proteins identified (QC run)

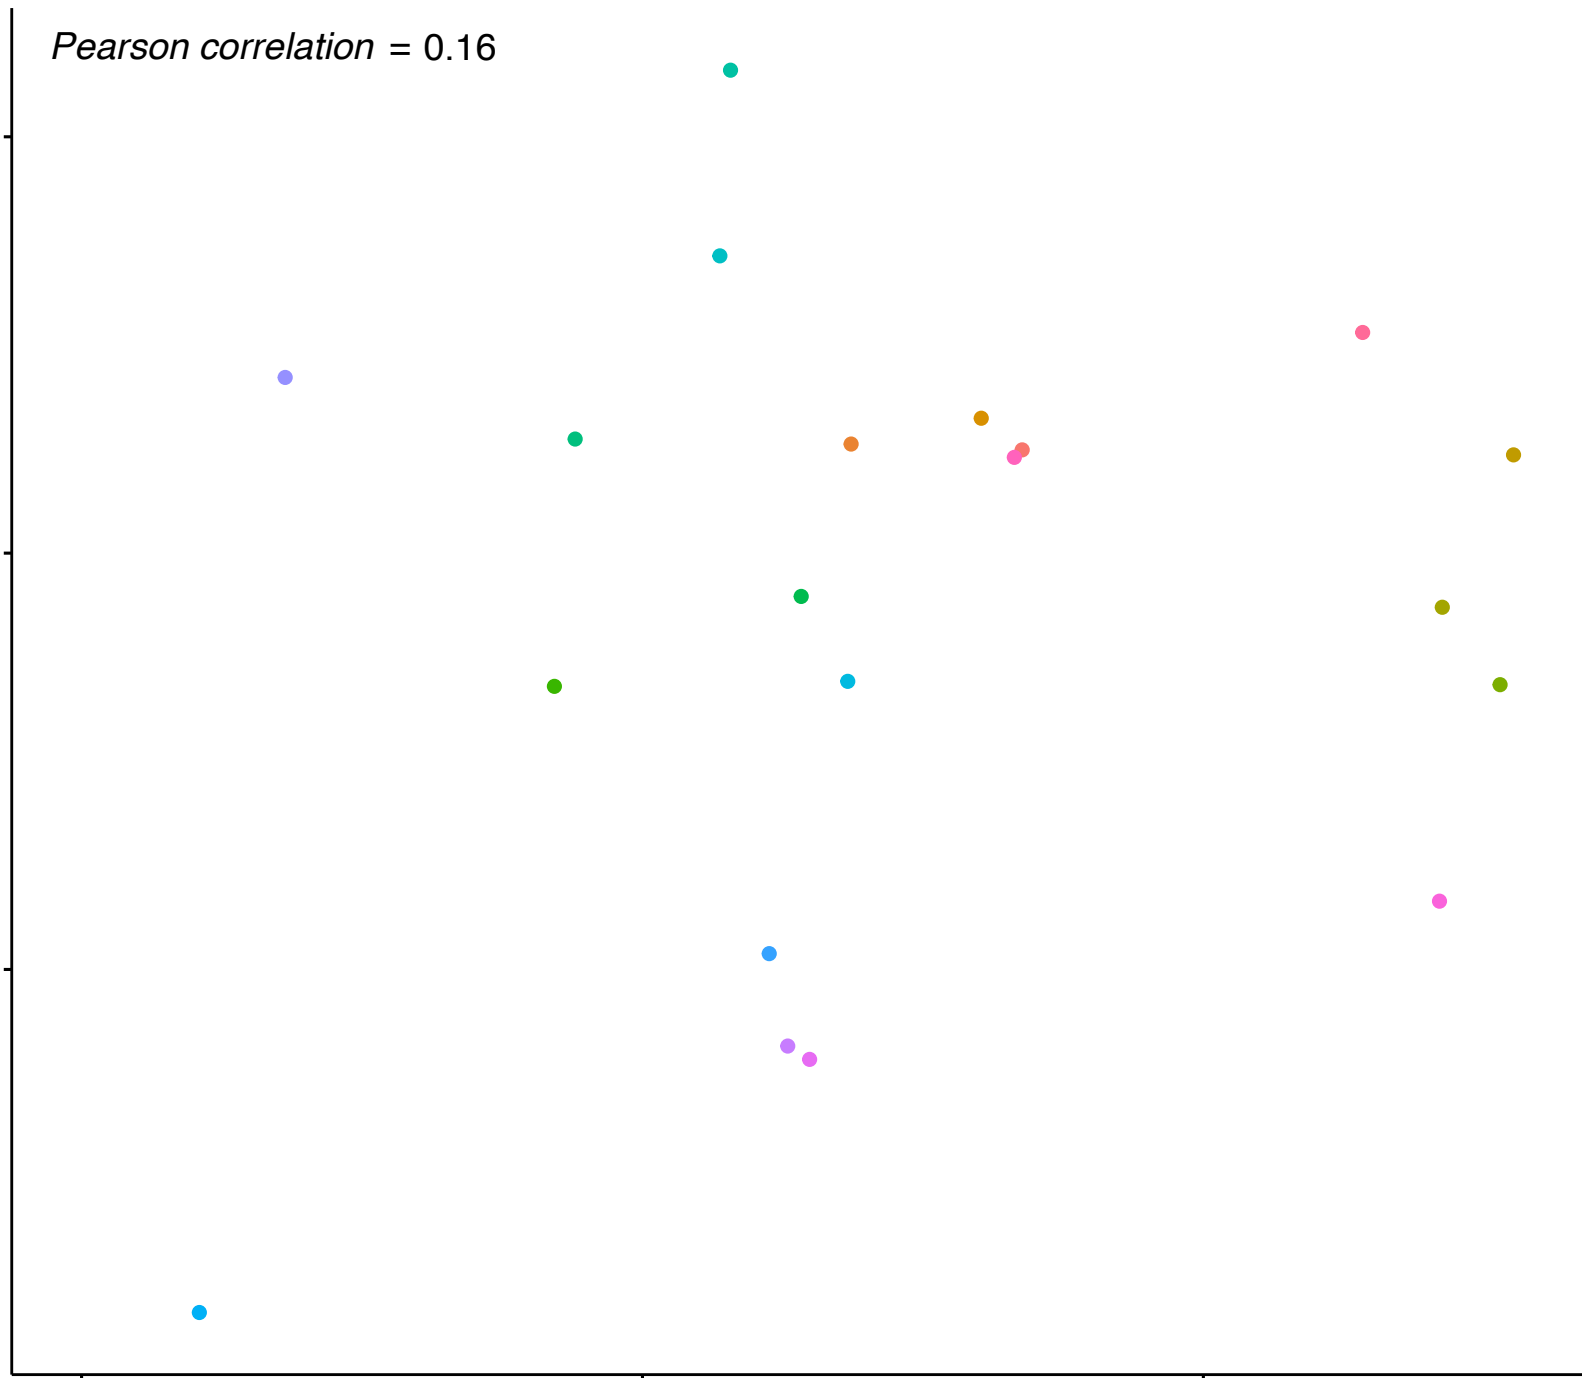

Supplement: 144550_2_supp_346188_psxjnr.pdf [file 144550_2_supp_346188_psxjnr.pdf]
